# Supplementary material
Source: PubMed Central journal article supplement (PMC8898317)
Supplement: NIHMS1736336-supplement-Supp1.pdf [file NIHMS1736336-supplement-Supp1.pdf]

## Supplementary Online Content

**Title:** Associations of Systemic Health and Medication Use with the Enlargement Rate of Geographic Atrophy in Age-related Macular Degeneration

**Authors:** Liangbo L. Shen,<sup>1</sup> Yangyiran Xie,<sup>2</sup> Mengyuan Sun,<sup>3</sup> Aneesha Ahluwalia,<sup>4</sup> Michael M. Park,<sup>5</sup> Benjamin K. Young,<sup>6</sup> Lucian V. Del Priore<sup>7</sup>

**Supplementary Table 1.** Association of Ocular and Imaging Factors with GA Perimeter-adjusted Growth Rate Based on Univariable Linear Mixed-effects Model

---

<sup>1</sup> Department of Ophthalmology, University of California, San Francisco, San Francisco, CA

<sup>2</sup> Vanderbilt University School of Medicine, Nashville, TN

<sup>3</sup> Department of Molecular Biophysics and Biochemistry, Yale University, New Haven, CT

<sup>4</sup> Byers Eye Institute, Department of Ophthalmology, Stanford University School of Medicine, Palo Alto, CA

<sup>5</sup> Department of Ophthalmology, New York Eye and Ear Infirmary of Mount Sinai

<sup>6</sup> Department of Ophthalmology and Visual Science, Kellogg Eye Center, University of Michigan Medical School, Ann Arbor, MI

<sup>7</sup> Department of Ophthalmology and Visual Science, Yale School of Medicine, New Haven, CT

Supplementary Table 1. Association of Ocular and Imaging Factors with GA Perimeter-adjusted Growth Rate Based on Univariable Linear Mixed-effects Model\*

|                                   | Category | Number of Eyes | Mean GA Perimeter-adjusted Growth Rate (SD), mm/year | Coefficient Estimate (95% CI), mm/yr | Overall p    |
|-----------------------------------|----------|----------------|------------------------------------------------------|--------------------------------------|--------------|
| Baseline GA area, mm <sup>2</sup> | -        | 318            | -                                                    | 0.000<br>(-0.001, 0.001)             | 0.75         |
| Baseline GA circularity index     | -        | 318            | -                                                    | -0.007<br>(-0.031, 0.016)            | 0.54         |
| Baseline number of lesions        | -        | 318            | -                                                    | 0.000<br>(-0.004, 0.004)             | 0.99         |
| Baseline center point involvement | Yes      | 143            | 0.094 (0.060)                                        | -0.005<br>(-0.018, 0.008)            | 0.42         |
|                                   | No       | 175            | 0.100 (0.063)                                        | Reference                            | -            |
| GA in the fellow eye at baseline  | Yes      | 190            | 0.105 (0.066)                                        | 0.012<br>(-0.0002, 0.025)            | 0.052        |
|                                   | No       | 128            | 0.087 (0.054)                                        | Reference                            | -            |
| GA in the fellow eye at any visit | Yes      | 280            | 0.102 (0.062)                                        | 0.034<br>(0.013, 0.055)              | <b>0.002</b> |
|                                   | No       | 38             | 0.068 (0.049)                                        | Reference                            | -            |

CI = confidence interval; GA = geographic atrophy; SD = standard deviation.

\* Data in this table were reported in our previous publication: Shen LL, Sun M, Ahluwalia A, Young BK, Park MM, Del Priore LV. Geographic Atrophy Growth is Strongly Related to Lesion Perimeter: Unifying Effects of Lesion Area, Number, and Circularity on Growth. *Ophthalmol Retina*. 2020.
